# Supplementary material
Source: MDPI journal article supplement (https://www.mdpi.com/2673-401X/3/3/12)
Supplement: s1 [file s1]

# Supplementary Materials

## Regioselective Transfer Hydrogenative Defluorination of Polyfluoroarenes Catalyzed by Bifunctional Azairidacycle

Asuka Matsunami, Shigeki Kuwata, and Yoshihito Kayaki\*

Department of Chemical Science and Engineering, School of Materials and Chemical Technology, Tokyo Institute of Technology, 2-12-1-E4-1 O-okayama, Meguro-ku Tokyo 152-8552, Japan

\*E-mail: ykayaki@o.cc.titech.ac.jp

### Contents

|                                                                  | Page |
|------------------------------------------------------------------|------|
| X-ray Crystallographic Data                                      | S2   |
| <sup>19</sup> F NMR Monitoring Experiments                       | S3   |
| Copies of NMR Spectra of <b>10</b> , <b>12a</b> , and <b>12b</b> | S4   |

## X-ray Crystallographic Data

**Table S1.** Crystallographic data for **7a** and **10**

|                                            | <b>7a</b>                                                                                          | <b>10</b>                                                                                            |
|--------------------------------------------|----------------------------------------------------------------------------------------------------|------------------------------------------------------------------------------------------------------|
| Empirical Formula                          | C <sub>8</sub> H <sub>2</sub> F <sub>2</sub> N <sub>2</sub>                                        | C <sub>6</sub> H <sub>4</sub> F <sub>2</sub> N <sub>2</sub> O                                        |
| Formula Weight                             | 164.11                                                                                             | 158.11                                                                                               |
| Crystal Color, Habit                       | colorless, prism                                                                                   | colorless, prism                                                                                     |
| Crystal System                             | monoclinic                                                                                         | monoclinic                                                                                           |
| Space Group                                | <i>P</i> 2 <sub>1</sub> / <i>c</i> (#14)                                                           | <i>P</i> 2 <sub>1</sub> / <i>c</i> (#14)                                                             |
| Lattice Parameters                         | <i>a</i> = 5.657(7) Å<br><i>b</i> = 9.448(12) Å<br><i>c</i> = 6.888(9) Å<br><i>β</i> = 101.70(2) ° | <i>a</i> = 3.691(2) Å<br><i>b</i> = 13.118 (8) Å<br><i>c</i> = 12.719(8) Å<br><i>β</i> = 92.960(7) ° |
| <i>Z</i> value                             | 2                                                                                                  | 4                                                                                                    |
| <i>D</i> <sub>calc</sub>                   | 1.512 g/cm <sup>3</sup>                                                                            | 1.707 g/cm <sup>3</sup>                                                                              |
| <i>F</i> <sub>000</sub>                    | 164.00                                                                                             | 320.00                                                                                               |
| μ(MoKα)                                    | 1.306 cm <sup>-1</sup>                                                                             | 1.600 cm <sup>-1</sup>                                                                               |
| Exposure Rate                              | 16.0 sec./°                                                                                        | 16.0 sec./°                                                                                          |
| No. of Reflections Measured                | 2738                                                                                               | 4923                                                                                                 |
| No. of Unique Reflections                  | 809                                                                                                | 1396                                                                                                 |
| No. Variables                              | 56                                                                                                 | 116                                                                                                  |
| <i>R</i> 1 ( <i>I</i> > 2.00σ( <i>I</i> )) | 0.0660                                                                                             | 0.0500                                                                                               |
| w <i>R</i> 2 (All Reflections)             | 0.1592                                                                                             | 0.1131                                                                                               |
| GOF on <i>F</i> <sup>2</sup>               | 1.000                                                                                              | 1.000                                                                                                |

$$R1 = \sum ||F_o| - |F_c|| / \sum |F_o|, wR2 = [ \sum ( w (F_o^2 - F_c^2)^2 ) / \sum w(F_o^2)^2 ]^{1/2}.$$

## <sup>19</sup>F NMR Monitoring Experiments

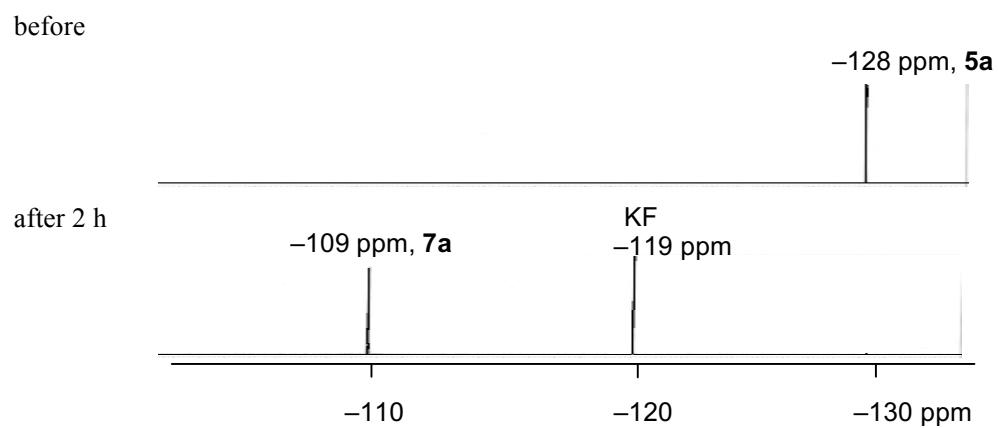

**Figure S1.** HDF of **5a** Monitored by <sup>19</sup>F NMR Spectroscopy.

# Copies of NMR Spectra of 10, 12a, and 12b

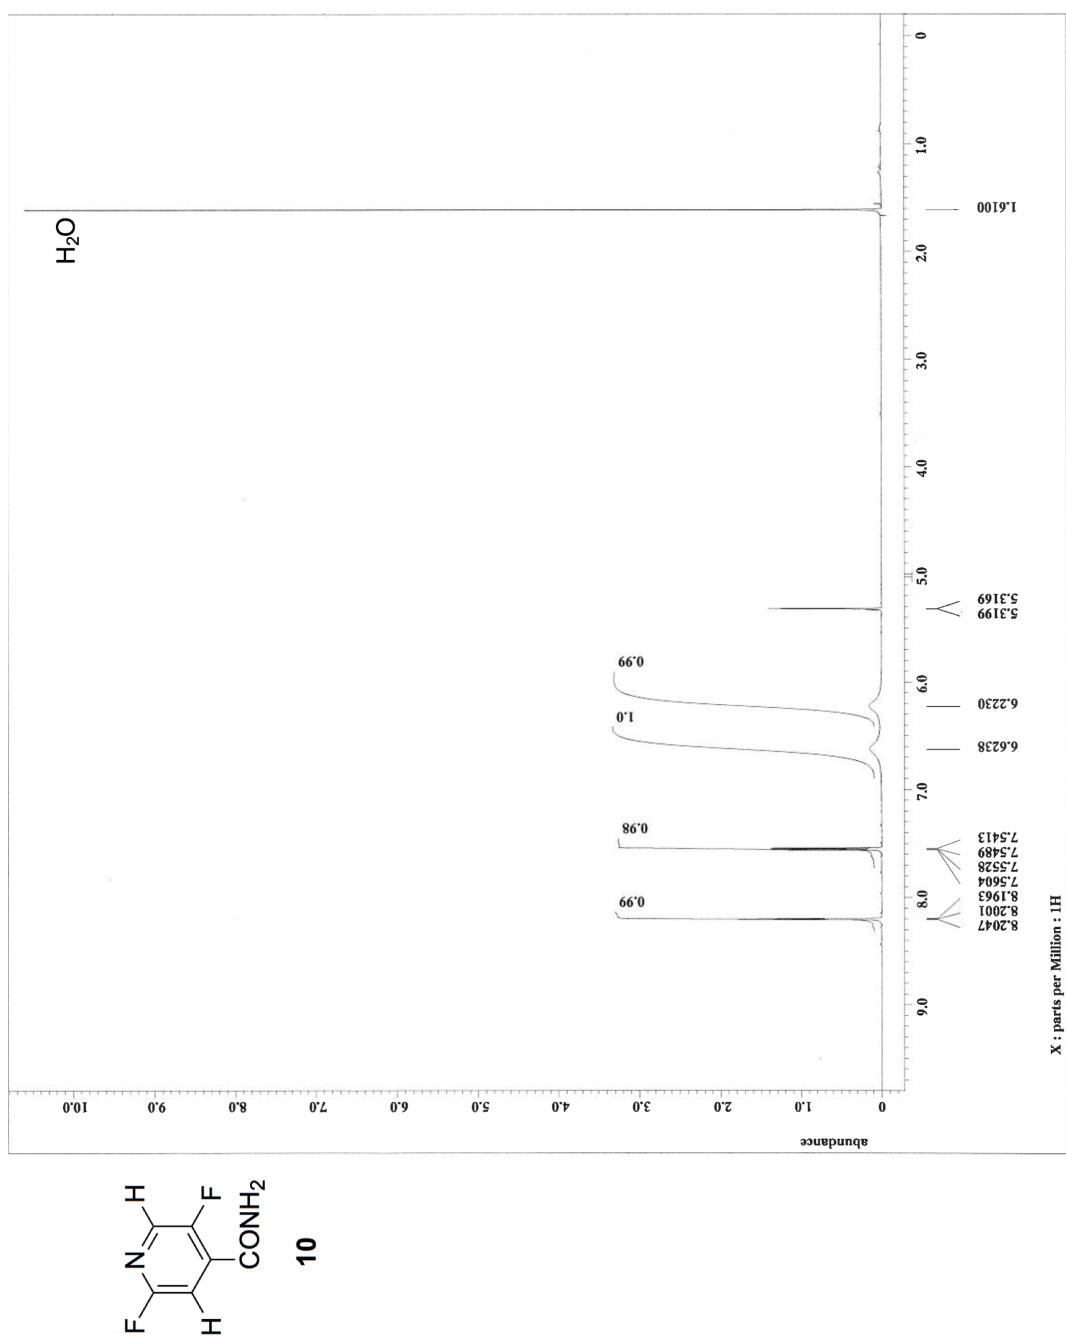

Figure S2.  $^1\text{H}$  NMR Spectrum of **10**.

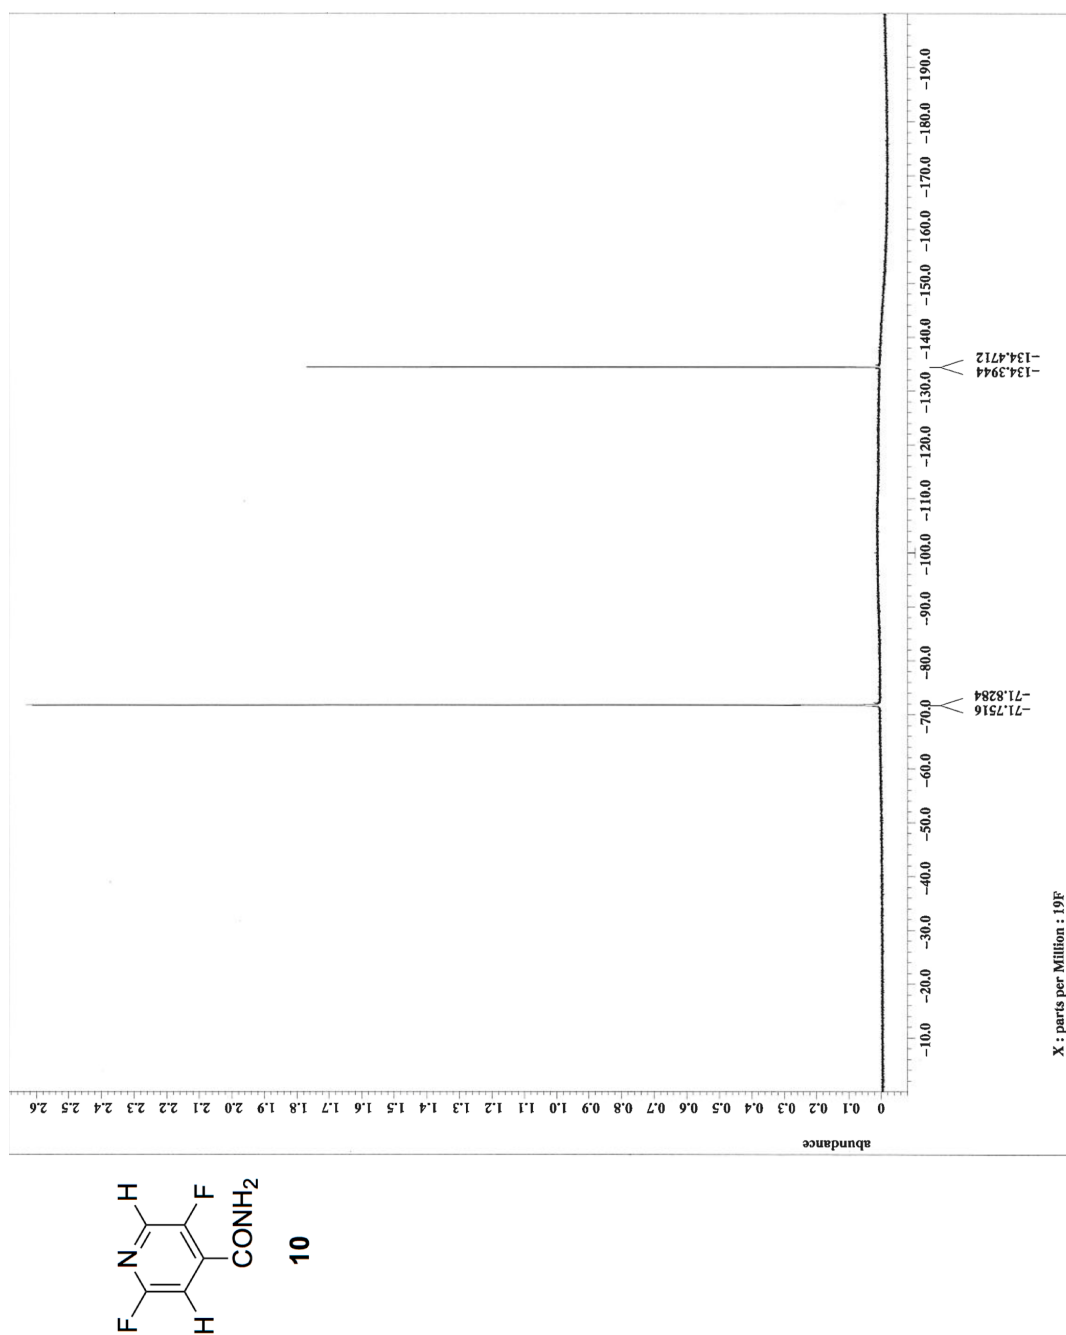

Figure S3.  $^{19}\text{F}$  NMR Spectrum of **10**.

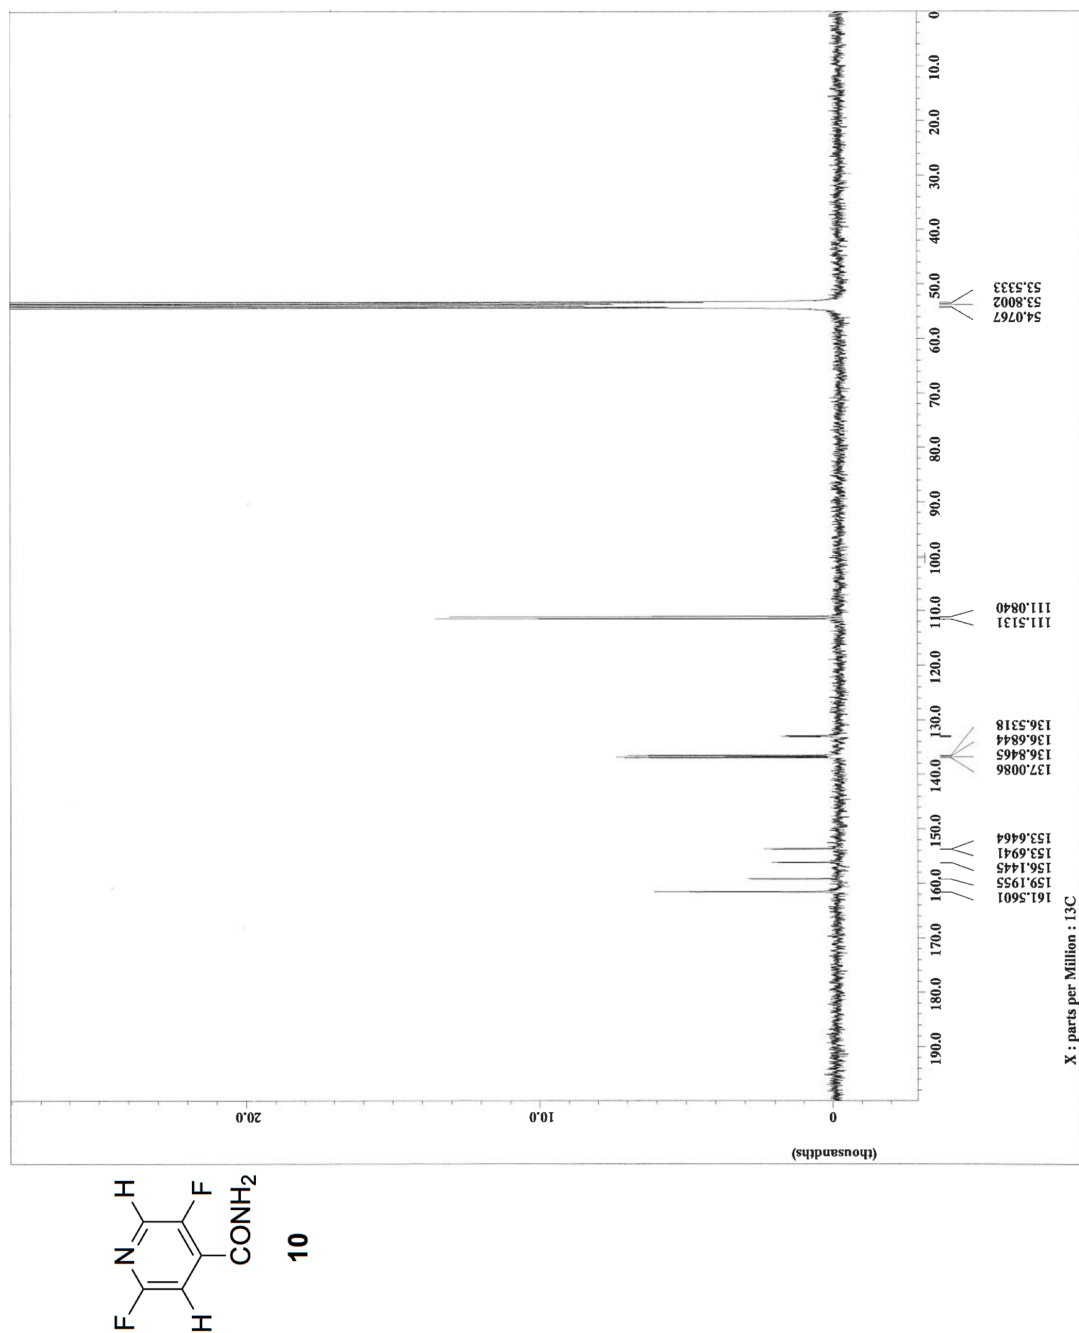

Figure S4.  $^{13}\text{C}\{^1\text{H}\}$  NMR Spectrum of **10**.

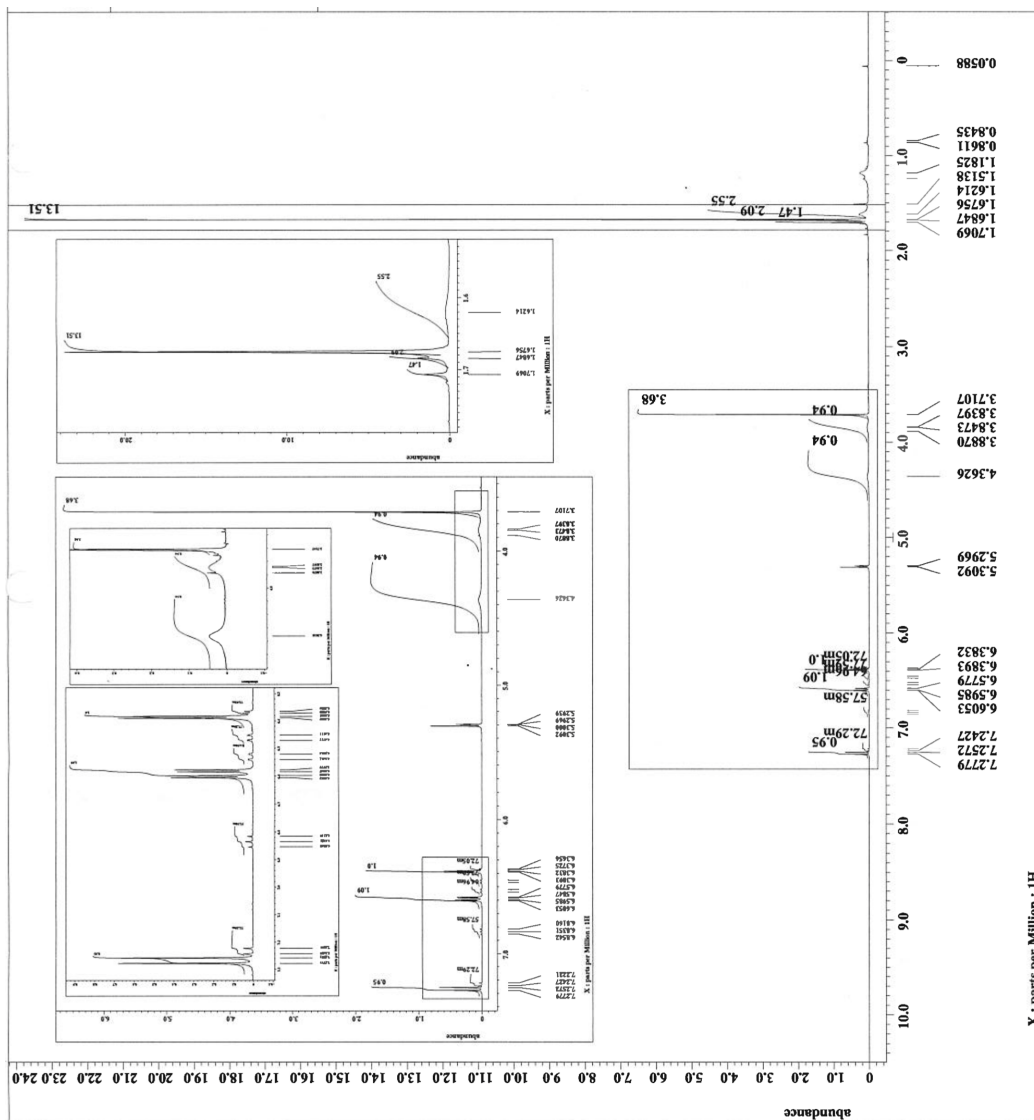

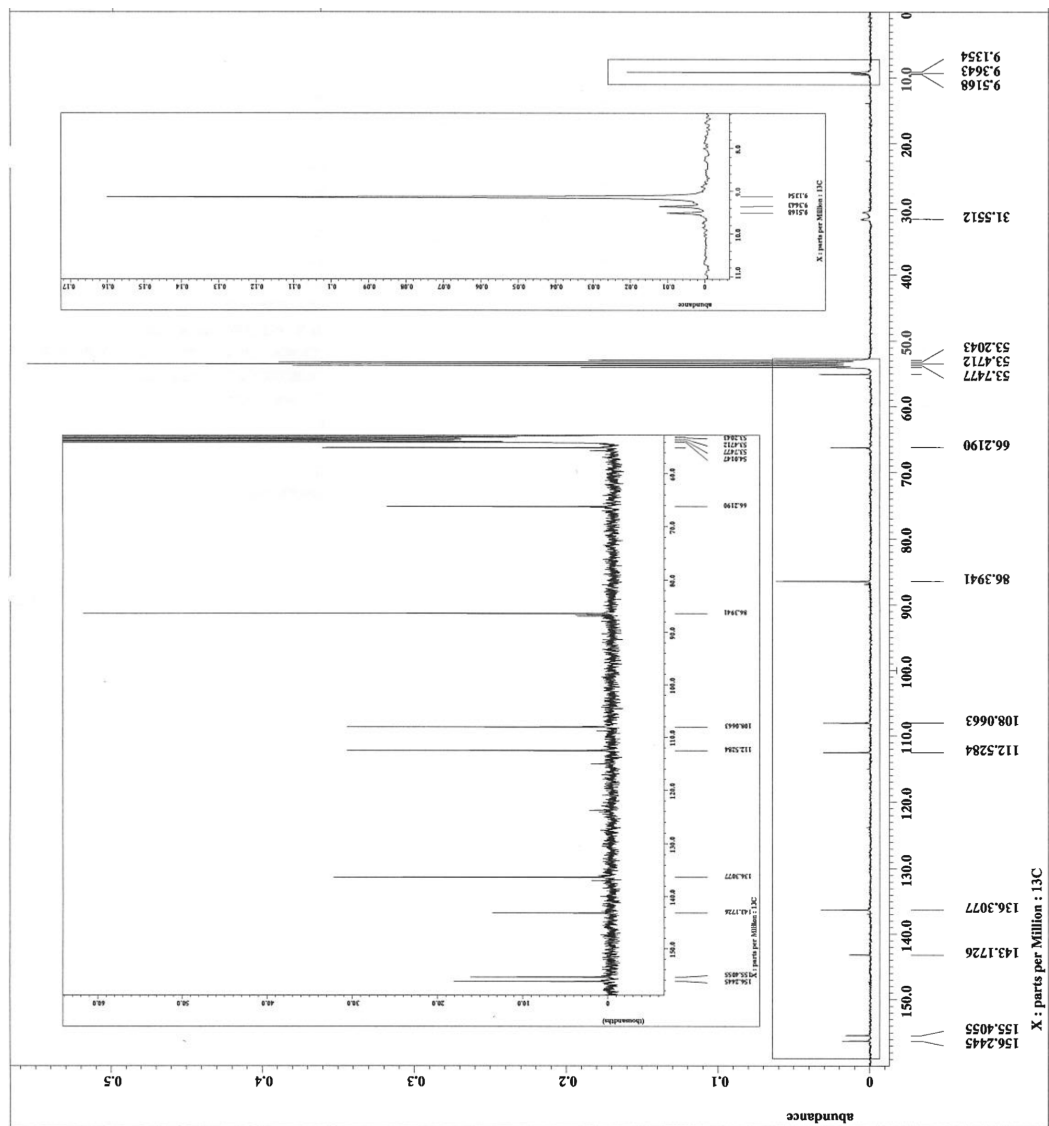

Figure S6. <sup>13</sup>C NMR Spectrum of **12a**.



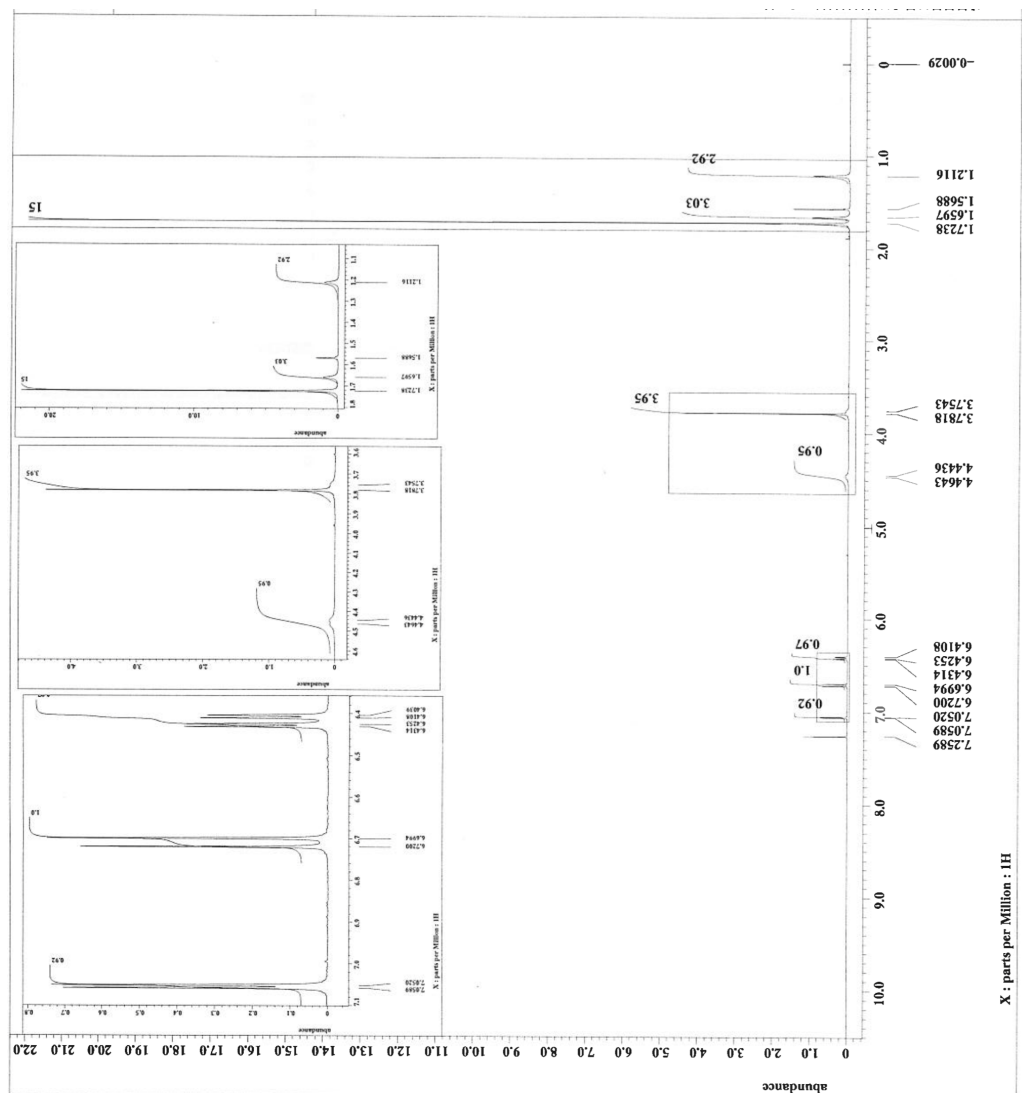

Figure S7. <sup>1</sup>H NMR Spectrum of 12b.

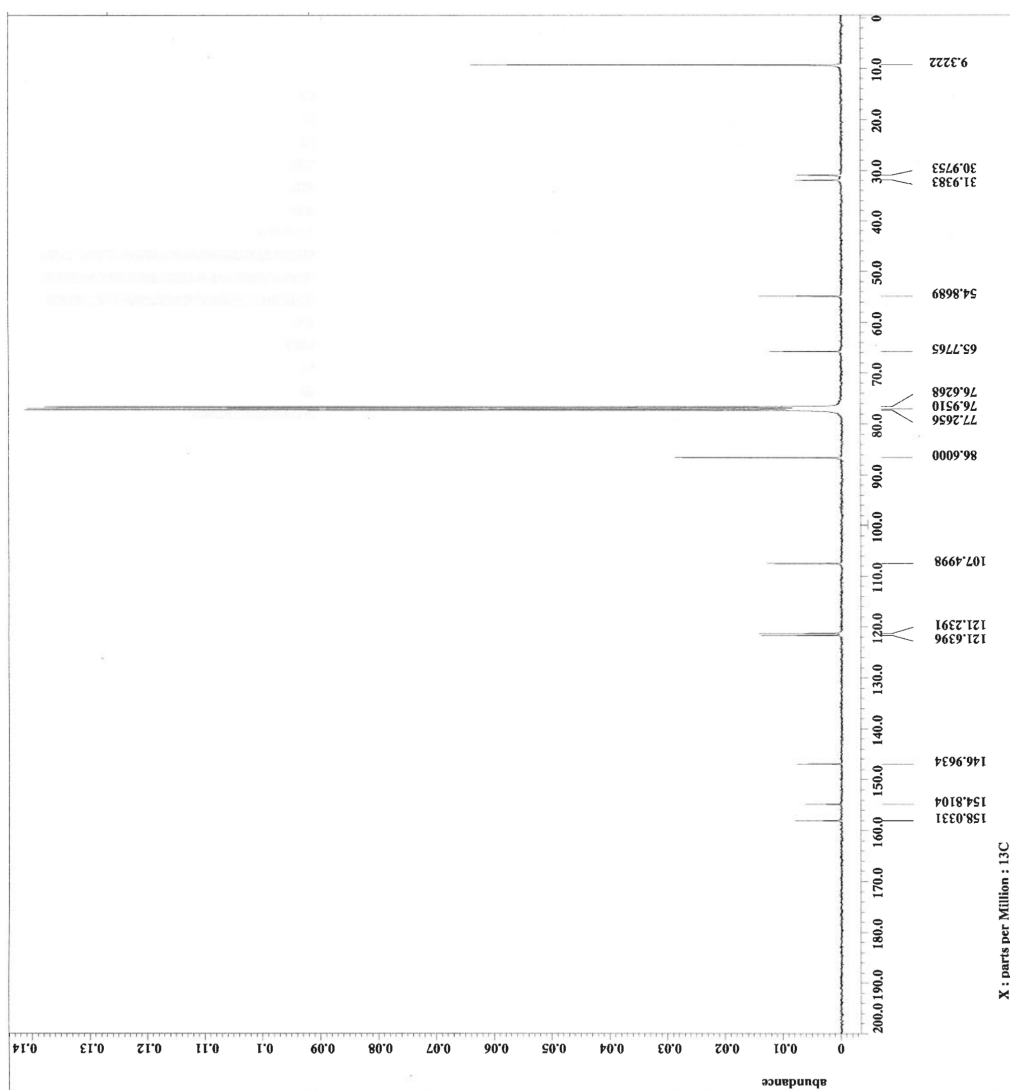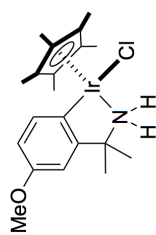

Figure S8.  $^{13}\text{C}$  NMR Spectrum of **12b**.
